# Supplementary material for: Heteroatoms chemical tailoring of aluminum nitrite nanotubes as biosensors for 5-hydroxyindole acetic acid (a biomarker for carcinoid tumors): insights from a computational study
Source: Royal Society of Chemistry journal article supplement (doi:10.1039/d4me00019f), 2024-01-01
Supplement: d4me00019f1.pdf [file d4me00019f1.pdf]

## ELECTRONIC SUPPORTING INFORMATION

**Table S1:** Bond distances between and 5HIAA and the doped metal of the AlNNT cages as wells the between the metal and surrounding Aluminum atoms.

| Systems        | Bond Labels | AlNNT-5HIAA | Bond lengths      |                  |
|----------------|-------------|-------------|-------------------|------------------|
|                |             |             | Before adsorption | After adsorption |
| 5HIAA_P@AlNNT  | P100-Al38   |             | 2.2941            | 2.2944           |
|                | P100-Al47   |             | 2.3105            | 2.3081           |
|                | P100-Al45   |             | 2.2920            | 2.2942           |
|                | H114-P100   | 2.4128      |                   |                  |
| 5HIAA_S@AlNNT  | S100-Al38   |             | 2.3562            | 2.3755           |
|                | P100-Al47   |             | 2.4117            | 2.4393           |
|                | P100-Al45   |             | 2.2598            | 2.2662           |
|                | H114-S100   | 1.9327      |                   |                  |
| 5HIAA_Si@AlNNT | Si100-Al38  |             | 2.3812            | 2.3705           |
|                | P100-Al47   |             | 2.4185            | 2.3761           |
|                | P100-Al45   |             | 2.3788            | 2.3586           |
|                | H114-Si100  | 1.9171      |                   |                  |

**Table S2:** Natural bond orbital (NBO) Analysis

| SYSTEMS        | Transition     | Donor (i)                                 | Occupancy | Acceptor (j)           | Occupancy | E(2)Kcal/mol | E(j)E(i)a.u. | F(I,j)a.u |
|----------------|----------------|-------------------------------------------|-----------|------------------------|-----------|--------------|--------------|-----------|
| 5HIAA_P@AlNNT  | $\pi$ -LP* (1) | $\pi^*$ Al <sub>52</sub> -N <sub>53</sub> | 1.90048   | LP*(1)Al <sub>43</sub> | 0.25649   | 29.53        | 0.39         | 0.100     |
| 5HIAA_S@AlNNT  | $\pi$ -LP* (1) | $\pi^*$ Al <sub>5</sub> N <sub>78</sub>   | 0.90491   | LP*(1)Al <sub>77</sub> | 0.18393   | 22.39        | 0.47         | 0.136     |
| 5HIAA_Si@AlNNT | LP-LP*         | LP (2) N <sub>78</sub>                    | 0.83319   | LP*(1)Al <sub>77</sub> | 0.12934   | 30.04        | 0.90         | 0.212     |
| P@AlNNT        | $\pi$ -LP* (1) | $\pi^*$ N <sub>63</sub> -A <sub>73</sub>  | 1.89967   | LP*(1)Al <sub>64</sub> | 0.25853   | 29.16        | 0.39         | 0.099     |
| S@AlNNT        | LP-LP*         | LP (2) N <sub>78</sub>                    | 0.83382   | LP*(1)Al <sub>77</sub> | 0.12989   | 29.41        | 0.90         | 0.209     |
| Si@AlNNT       | LP-LP*         | LP (1) N <sub>7</sub>                     | 0.83850   | LP*(1)Al <sub>5</sub>  | 0.13042   | 31.80        | 0.90         | 0.217     |
